# Supplementary material for: Guidelines for reporting research using systematic coding of observed human behaviour (SCOBe)
Source: Springer Nature journal article supplement (doi:10.1007/s11135-024-01969-9), 2024-10-18
Supplement: MOESM1 [file 11135_2024_1969_MOESM1_ESM.pdf]

## Appendix A. Glossary

“Guidelines for reporting research using Systematic Coding of Observed human Behaviour (SCOBe)”; Hillen et al.; Quality and Quantity  
Corresponding author affiliation: Dr. M.A. Hillen; Dep. Medical Psychology,  
Amsterdam Public Health, Amsterdam UMC, Amsterdam, the Netherlands;  
[m.a.hillen@amsterdamumc.nl](mailto:m.a.hillen@amsterdamumc.nl)

**Behaviour:** The term ‘behaviour’ is used in a broad sense, following the definition by the American Psychological Association as ‘an organism’s activities in response to external or internal stimuli, including objectively observable activities, introspectively observable activities (see covert behaviour), and nonconscious processes’ (Mauss & Robinson, 2009). Hence, whenever we use the term ‘behaviour’, this may also refer to an individual’s emotions, states or attributes. Additionally, although human behaviour was the main point of reference during the development process, the presented guidelines may be applicable to a broader range of subjects, including animals and robots.

**Code (alternative terms: label, measure, behaviour):** A meaningful, pre-defined identifier that classifies, categorises, and/or represents a specific measure or behaviour. Several codes combined may constitute an ‘overarching code’ or dimension.

**Codebook (alternative terms: coding manual, guide, instructions):** A document that provides detailed instructions and guidelines for coding data, the coding scheme, and examples of how to apply the codes.

**Coded data:** Data that result from applying the coding scheme to the source data.

**Coder drift (alternative term: observer drift):** The phenomenon of coders changing the manner in which they apply the behavioural codes over time (Harris & Lahey, 1982, p.544). Consensual coder drift is the phenomenon of coders adjusting their interpretations to agree with other coders for stronger inter-observer agreement.

**Coding scheme (alternative terms: ethogram, template, schedule, reference):** A catalogue or directory of codes (including code definitions and abbreviations), often detailing the organisation, grouping, or hierarchy of codes within a coding system.

**Source data:** Initial observations to which the coding scheme is applied (e.g., video clips).

## References

- Harris, F. C., & Lahey, B. B. (1982). Subject reactivity in direct observational assessment: A review and critical analysis. *Clinical Psychology Review*, 2(4), 523-538.
- Mauss, I. B., & Robinson, M. D. (2009). Measures of emotion: A review. *Cognition and emotion*, 23(2), 209-237.
