# Supplementary material for: Guidelines for reporting research using systematic coding of observed human behaviour (SCOBe)
Source: Springer Nature journal article supplement (doi:10.1007/s11135-024-01969-9), 2024-10-18
Supplement: MOESM2 [file 11135_2024_1969_MOESM2_ESM.pdf]

## Appendix B – Further reading of literature providing guidance for SCOBe research

“Guidelines for reporting research using Systematic Coding of Observed human Behaviour (SCOBe)”; Hillen et al.; Quality and Quantity

Corresponding author affiliation: Dr. M.A. Hillen; Dep. Medical Psychology, Amsterdam Public Health, Amsterdam UMC, Amsterdam, the Netherlands; [m.a.hillen@amsterdamumc.nl](mailto:m.a.hillen@amsterdamumc.nl)

| Authors                           | Field of publication     | Focus of guidance                   |
|-----------------------------------|--------------------------|-------------------------------------|
| 1. Hartman et al., 2003 [1]       | Psychology               | Comprehensive guidance              |
| 2. Pellegrini et al., 2012 [2]    | Developmental psychology | Comprehensive guidance              |
| 3. Margolin et al., 1998 [3]      | Developmental psychology | Comprehensive guidance              |
| 4. Chorney et al, 2015 [4]        | Pediatric psychology     | Comprehensive guidance              |
| 5. Portell et al., 2015 [5]       | Behavioural research     | Comprehensive guidance              |
| 6. Yoder & Symons, 2010 [6]       | Behavioural research     | Comprehensive guidance              |
| 7. Furr et al., 2007 [7]          | Social psychology        | Comprehensive guidance              |
| 8. Aspland et al., 2003 [8]       | Developmental psychology | Discipline specific guidance        |
| 9. Van Dulmen et al., 2012 [9]    | Healthcare communication | Discipline specific guidance        |
| 10. Anguera et al., 2018 [10]     | Psychology               | Development of a coding framework   |
| 11. Koo & Lie, 2016 [11]          | Medicine                 | Guidance on inter-rater reliability |
| 12. Bakeman et al., 2009 [12]     | Behavioural research     | Guidance on inter-rater reliability |
| 13. Hallgren, 2012 [13]           | Psychology               | Guidance on inter-rater reliability |
| 14. Dishion et al. 2017 [14]      | Developmental Psychology | Guidance on code application        |
| 15. Levine et al., 2023 [15]      | Psychology               | Ethical considerations              |
| 16. Legewie & Nassauer, 2018 [16] | Social sciences          | Ethics of video recording           |
| 17. Soto et al., 2022 [17]        | Sports and health        | Example of coding software          |

### References

- [1] Hartmann DP, Barrios BA, Wood DD. Principles of behavioral observation. Comprehensive handbook of psychological assessment. 2003;3:108-27.
- [2] Pellegrini AD, Symons F, Hoch J. Observing children in their natural worlds: A methodological primer: Psychology Press; 2012.
- [3] Margolin G, Oliver PH, Gordis EB, O'hearn HG, Medina AM, Ghosh CM, Morland L. The nuts and bolts of behavioral observation of marital and family interaction. Clinical child and family psychology review. 1998;1:195-213.
- [4] Chorney JM, McMurtry CM, Chambers CT, Bakeman R. Developing and modifying behavioral coding schemes in pediatric psychology: a practical guide. Journal of pediatric psychology. 2015;40:154-64.
- [5] Portell Vidal M, Anguera Argilaga MT, Chacón Moscoso S, Sanduvete Chaves S. Guidelines for reporting evaluations based on observational methodology. Psicothema, 27 (3), 283-289. 2015.
- [6] Yoder P, Symons F. Observational measurement of behavior: Springer Publishing Company; 2010.
- [7] Furr RM, Funder DC. Behavioral observation. Handbook of research methods in personality psychology. 2007:273-91.
- [8] Aspland H, Gardner F. Observational measures of parent-child interaction: an introductory review. Child and Adolescent Mental Health. 2003.
- [9] van Dulmen S, Humphris G, Eide H. Towards a guideline for person-centered research in clinical communication; lessons learned from three countries. International Journal of Person Centered Medicine. 2012;2:58-63.
- [10] Anguera MT, Portell M, Chacón-Moscoso S, Sanduvete-Chaves S. Indirect observation in everyday contexts: concepts and methodological guidelines within a mixed methods framework. Frontiers in psychology. 2018;9:13.
- [11] Koo TK, Li MY. A guideline of selecting and reporting intraclass correlation coefficients for reliability research. Journal of chiropractic medicine. 2016;15:155-63.

- [12] Bakeman R, Quera V, Gnisci A. Observer agreement for timed-event sequential data: A comparison of time-based and event-based algorithms. *Behavior Research Methods*. 2009;41:137-47.
- [13] Hallgren KA. Computing inter-rater reliability for observational data: an overview and tutorial. *Tutorials in quantitative methods for psychology*. 2012;8:23.
- [14] Dishion TJ, Mun CJ, Tein J-Y, Kim H, Shaw DS, Gardner F, Wilson MN, Peterson J. The validation of macro and micro observations of parent–child dynamics using the relationship affect coding system in early childhood. *Prevention Science*. 2017;18:268-80.
- [15] Levine M, Philpot R, Nightingale S, Kordoni A. *Visual Digital Data, Ethical Challenges and Psychological Science*. 2023.
- [16] Legewie N, Nassauer A. YouTube, Google, Facebook: 21st century online video research and research ethics. *Forum Qualitative Sozialforschung/Forum: Qualitative Social Research: DEU*; 2018. p. 21.
- [17] Soto-Fernández A, Camerino O, Iglesias X, Anguera MT, Castañer M. LINCE PLUS software for systematic observational studies in sports and health. *Behavior research methods*. 2022:1-9.
