# Supplementary material for: Guidelines for reporting research using systematic coding of observed human behaviour (SCOBe)
Source: Springer Nature journal article supplement (doi:10.1007/s11135-024-01969-9), 2024-10-18
Supplement: MOESM3 [file 11135_2024_1969_MOESM3_ESM.pdf]

### Online resource C. SCObE checklist form

| Item                       | Domains and criteria                                 | Explanation                                                                                                                                                                                                                              | Location where item is reported | Details on methodological approach* |
|----------------------------|------------------------------------------------------|------------------------------------------------------------------------------------------------------------------------------------------------------------------------------------------------------------------------------------------|---------------------------------|-------------------------------------|
| Domain 1: Research context |                                                      |                                                                                                                                                                                                                                          |                                 |                                     |
| 1                          | Concept(s) under study                               | Describe the research concept(s) on which the systematic observational coding focuses, including any potential sub-concepts, preferably including empirical and theoretical foundation.                                                  |                                 |                                     |
| 2                          | Rationale for use of systematic observational coding | Explain why systematic observational coding was chosen as the most appropriate method for the study and how it links to the theoretical framework.                                                                                       |                                 |                                     |
| 3                          | Context of research                                  | Provide a description of the context of the observational research and report where and when source data were obtained.                                                                                                                  |                                 |                                     |
| 4                          | Research population                                  | Specify who were present in the observation and whose behaviours were being coded. Report relevant characteristics of the sample.                                                                                                        |                                 |                                     |
| 5                          | Acquisition of source data                           | Describe observational data sources, how these were obtained (e.g., video, audio, in situ, or transcription; level of experimental manipulation; level of researcher participation), and whether the data were collected for the current |                                 |                                     |

|                                                        |                                                                                   |                                                                                                                                                                                                                                   |  |  |
|--------------------------------------------------------|-----------------------------------------------------------------------------------|-----------------------------------------------------------------------------------------------------------------------------------------------------------------------------------------------------------------------------------|--|--|
|                                                        |                                                                                   | research aim (primary or secondary data).                                                                                                                                                                                         |  |  |
| 6                                                      | Sampling within available source data                                             | Describe the sampling approach, for example, the designated periods or events within the source data in which the concepts were coded.                                                                                            |  |  |
| <b>Domain 2: Properties of coding scheme</b>           |                                                                                   |                                                                                                                                                                                                                                   |  |  |
| <b>Domain 2a: General description of coding scheme</b> |                                                                                   |                                                                                                                                                                                                                                   |  |  |
| 7                                                      | Name and availability of the coding scheme                                        | Provide the name of the coding scheme. Ideally, provide the full coding scheme and codebook in the manuscript or supplementary materials. If that is not possible, provide information on how readers can access those materials. |  |  |
| 8                                                      | Rationale for use of this specific coding scheme                                  | Provide an explanation for the selection and use of this specific coding scheme (versus other available schemes).                                                                                                                 |  |  |
| 9                                                      | Validity and reliability of the coding scheme as established in previous research | Provide the validity and reliability of the original coding scheme as it has been established in previous research.                                                                                                               |  |  |
| 10                                                     | Specification of codes                                                            |                                                                                                                                                                                                                                   |  |  |
| 10a                                                    | Description of codes                                                              | Provide a description and explanation of all the codes that were used in the study.                                                                                                                                               |  |  |
| 10b                                                    | Connections between codes                                                         | Describe the interrelatedness of the different codes, including potential hierarchy between the                                                                                                                                   |  |  |

|                                                                             |                                                                         |                                                                                                                                                                                                                        |  |  |
|-----------------------------------------------------------------------------|-------------------------------------------------------------------------|------------------------------------------------------------------------------------------------------------------------------------------------------------------------------------------------------------------------|--|--|
|                                                                             |                                                                         | codes, whether codes were mutually exclusive and exhaustive, and any prioritisation in coding procedures.                                                                                                              |  |  |
| 10c                                                                         | Granularity of codes                                                    | Specify the coding unit, i.e., the level of specificity at which codes were assigned (e.g., micro or macro level).                                                                                                     |  |  |
| Domain 2b: General description of newly developed or modified coding scheme |                                                                         |                                                                                                                                                                                                                        |  |  |
| 11                                                                          | Justification for coding scheme modification or development             | Describe why a coding scheme was modified or developed. That is, describe why existing coding schemes could not be used and elaborate on the theoretical and empirical framework of the new or modified coding scheme. |  |  |
| 12                                                                          | Modification or development process                                     | Specify how the coding scheme was developed or modified.                                                                                                                                                               |  |  |
| 13                                                                          | Validity assessment for the newly developed or modified coding scheme   | Describe how validity of the newly developed or modified coding scheme was established, and which types of validity were assessed.                                                                                     |  |  |
| 14                                                                          | Reliability assessment of the newly developed or modified coding scheme | Describe how reliability of the newly developed or modified coding scheme was established, and which types of reliability were assessed.                                                                               |  |  |
| Domain 3: Application of coding scheme                                      |                                                                         |                                                                                                                                                                                                                        |  |  |

|    |                                                               |                                                                                                                                                                                                                                                                   |  |  |
|----|---------------------------------------------------------------|-------------------------------------------------------------------------------------------------------------------------------------------------------------------------------------------------------------------------------------------------------------------|--|--|
| 15 | Coder selection and training                                  | Describe the process of training individuals to apply the coding scheme to the data correctly and reliably in relation to the study purpose. Additionally, describe any relevant information related to the selection, eligibility, and/or suitability of coders. |  |  |
| 16 | Coding procedures                                             | Provide a comprehensive description of how and by whom the codes were practically applied to the raw observational data, including the calibration process.                                                                                                       |  |  |
| 17 | Reliability preservation throughout coding scheme application | Describe the steps taken to maintain reliability during the coding process, i.e., procedures to minimise coder drift and reliability outcomes achieved when applying the coding scheme to source data.                                                            |  |  |
| 18 | Ethical considerations                                        | Describe ethical considerations and aspects of the approval process relevant or pertinent to the observations undertaken.                                                                                                                                         |  |  |
| 19 | Facilitating software                                         | Describe which software was used to view, code, and analyse the data.                                                                                                                                                                                             |  |  |
| 20 | Data preparation and analysis                                 | Describe how coded data were prepared pre-analysis and which descriptive and statistical tests were applied.                                                                                                                                                      |  |  |

<sup>§</sup>Reporting order may vary depending on disciplinary standards and/or journal requirements.

\*Authors may report additional methodological details in this column beyond the information included in their main manuscript.
